# Supplementary material
Source: Research Square preprint supplement (doi:10.21203/rs.3.rs-9546046/v1)
Supplement: Supplementary file 1 [file 96e330416ced7a63c08d30b0.docx]

Table 1: Sampling Sites and Numbers of Samples obtained

| **Sampling Sites** | **Number of Washing Machines per samples** |
| --- | --- |
| Hospitals | 5 |
| Hostel | 6 |
| Household/Homes | 5 |
| Laundry shops | 11 |
| Hotels and suites | 7 |
| Total | 34 |

**TABLE 2a: Morphology, Microscopic and Biochemical characterisation of bacteria obtained from Hospitals’ washing machines**

| Isolates Code | Colour | Shape | Elevation | Margin | Gram Reaction | Catalase | Coagulase | Citrate | Urease | Indole | Casein hydrolysis | Starch hydrolysis | Maltose fermentation | Probable identification |
| --- | --- | --- | --- | --- | --- | --- | --- | --- | --- | --- | --- | --- | --- | --- |
| BTH10-5 | Cream | Round | Flat | Entire | + cocci | + | - | + | + | + | - | - | - | *Jeotgalicoccus pimipedialis* |
| LTH10-3 | Cream | Round | Flat | Entire | + cocci | + | - | + | + | - | - | - | - | *Mycobacterium cheloriae* |
| LHC1 | Pink | Round | raised | Entire | + rod | + | - | + | + | - | - | - | - | *Verticella sediminum* |
| BTH10-4 | Cream | Round | Flat | Entire | + cocci | + | - | - | + | - | - | + | - | *Clostridium sartagoforme* |
| MHS10-3a | Cream | Round | Flat | Entire | - rod | + | - | + | + | - | + | - | - | *Acidovoieix facillis* |
| LTH2 | Cream | Round | Flat | Entire | + rod | + | - | + | + | - | - | - | - | *Brevundinoas dininuta* |
| BTH10-3c | Cream | Round | Flat | Entire | - rod | + | - | + | + | - | + | - | - | *Oligella ureolytica* |
| MHS3 | Cream | Round | Flat | Entire | + cocci | + | - | + | + | - | - | - | - | *Kocuna marina* |
| GHS10-3b | Cream | Irregular | raised | Entire | + cocci | + | - | + | + | - | - | - | - | *Salinicoccus alikaliphilus* |
| GHS10-3 | Cream | Round | Flat | Entire | + rod | + | - | + | + | - | - | - | - | *Lysinbacillus sphaericus* |
| LHC1 | Cream | Round | Flat | Entire | + cocci | + | + | + | + | - | - | - | - | *AbyssicoccusAlbus* |
| LHC1b | Cream | Irregular | Flat | Undulate | - rod | + | - | + | + | - | - | - | - | *Jeotgalicocccus halophilus* |
| MHS2 | Cream | Round | Flat | Entire | + cocci | + | - | + | + | - | - | + | - | *Staphylococcus equorum* |
| BTH10-3b | Cream | Round | Flat | Entire | + rod | + | - | + | + | - | - | + | - | *Paunibacillus septentrionalis* |
| GHS 2a | Pink | Irregular | Flat | Undulate | + cocci | + | - | + | + | - | + | - | - | *Jeotgalicoccus halophilus* |
| LHC10-3c | Cream | Irregular | Flat | Undulate | + cocci | + | - | + | + | - | + | + | - | *Staphylococcus equorum* |
| LHC-3a | Cream | Irregular | raised | Entire | + cocci | + | - | + | + | - | - | - | + | *Salinicoccus luteus* |
| LTH 3b | Pink | Round | Flat | Entire | + cocci | + | - | + | + | - | - | + | + | *Salinicoccus hispenicus* |
| LTH 2b | Cream | Round | Flat | Entire | + cocci | + | - | + | + | - | - | + | + | *Staphylococcus equorum* |
| MHS 2 | Cream | Round | F lat | Entire | + rod | + | - | + | + | - | - | - | - | *Staphylococcus equorum* |
| LHC 10-3b | Cream | Round | Flat | Entire | + rod | + | - | + | + | - | + | - | - | *Verticella sediminum* |
| LTH 3 | Cream | Irregular | Flat | Undulate | + rod | + | - | + | + | + | - | - | - | *Lysinbacillus sphaericus* |
| LTH 10-3b | Pink | Irregular | raised | Undulate | + rod | + | - | + | + | - | - | - | - | *Verticella sediminum* |
| BTH 3 | Cream | Round | Flat | Entire | + rod | + | - | + | + | - | - | - | - | *Lysinbacillus sphaericus* |
| GHS 10-3c | Pink | Round | raised | Entire | + cocci | + | - | + | + | - | - | - | - | *Jeotgalicoccus halophilus* |
| GHS 10-3 | Cream | Round | Flat | Entire | + rod | + | - | + | + | - | + | - | - | *Lysinbacillus fusiformis* |
| LHC 1b | Cream | Round | Flat | Entire | - rod | + | - | - | + | - | - | - | - | *Alcaligenes spp* |
| BTH 1 | Pink | Irregular | Flat | Entire | + cocci | + | - | + | + | - | - | - | - | *Salinicoccus alkaliphilus* |
| LTH -3b | Cream | Irregular | raised | Entire | - rod | + | - | + | + | - | + | + | + | *Burkholderia pseudomallri* |
| LTH 10-3a | Cream | Round | raised | Entire | + cocci | + | - | + | + | - | - | - | - | *Staphylococcus hominis* |
| BTH 10-3b | Cream | Round | raised | Entire | - rod | + | - | + | + | - | - | + | - | *Proteus mirabilis* |
| MHS 3 | Cream | Round | raised | Undulate | + cocci | + | - | - | + | - | + | - | + | *Stapylococcus epidermis* |

Key: ‘+’ = positive, ‘-’ = negative

**TABLE 2b: Morphology, Microscopic and Biochemical characterisation of bacteria obtained from Laundromats’ washing machines**

| Isolates Code | Colour | Shape | Elevation | Margin | Gram Reaction | Catalase | Coagulase | Citrate | Urease | Indole | Casein hydrolysis | Starch hydrolysis | Maltose fermentation | Probable identification |
| --- | --- | --- | --- | --- | --- | --- | --- | --- | --- | --- | --- | --- | --- | --- |
| KLS 10-3a | Pink | Irregular | Flat | Entire | + cocci | + | - | + | + | - | - | + | - | *Salinicoccus alkaliphilus* |
| LAA 2 | Cream | Round | Flat | Entire | - rod | + | - | + | + | - | + | - | - | *Burkholderia glodioii* |
| CCL 10-3a | Cream | Round | Flat | Entire | + cocci | + | - | - | - | - | + | - | - | *Jeotgalicoccus pinnipedialis* |
| HCR 1b | PINK | Round | Flat | Entire | + rod | + | - | - | - | - | + | - | - | *Lysinbacillus fusiformis* |
| HCR 10-3c | Cream | Irregular | Flat | Undulate | - cocci | + | - | + | - | - | + | + | + | *Chromobacterium rhizorzae* |
| WLS 10-3b | Cream | Round | Flat | Entire | + rod | + | - | + | - | - | - | - | - | *Aneurinibacillus aneurinilyticus* |
| WLS 10-3b | Cream | Round | raised | Undulate | - rod | + | - | + | - | + | - | - | - | *Aneurinibacillus aneurinilyticus* |
| DTL-3a | Cream | Round | Flat | Entire | + rod | + | - | + | - | - | + | - | - | *Lysinbacillus sphaericus* |
| GDC 1 | Pink | Fillamentous | Flat | Entire | + cocci | + | - | + | + | + | - | - | - | *Nosocomiicoccus ampullae* |
| JFH 10-3b | Pink | Round | Flat | Undulate | + cocci | + | - | + | - | - | - | + | - | *Staphylococcus capitis* |
| JFH 3 | Cream | Fillamentous | Flat | Entire | - rod | + | - | - | - | - | + | + | - | *Bacillus vietnamensis* |
| LAA 10-3 | Cream | Round | Flat | Entire | + rod | + | - | + | - | - | - | + | + | *Clostridium tertian* |
| JAL 10-3b | Pink | Round | Flat | Entire | + rod | + | - | + | - | - | - | - | - | *Paunibacillus macquariensis* |
| JAL 1b | Pink | Round | Flat | Entire | + rod | + | - | - | - | - | - | + | - | *Paunibacillus thailandensis* |
| KLS 10-3b | Cream | Round | raised | Undulate | + cocci | + | - | + | - | - | - | + | + | *Salinicoccus luteus* |
| KLS 3 | Cream | Round | Flat | Entire | + rod | + | - | - | - | - | - | - | - | *Jeotgalicoccus pinnipedialis* |
| DTL 10-3a | Pink | Round | Flat | Entire | + rod | + | - | + | - | - | - | - | - | *Lysinbacillus sphaericus* |
| JAL 10-4 | Cream | Irregular | raised | Undulate | + rod | + | - | + | - | - | - | - | - | *Clostridium innocuum* |
| HCR 10-3b | Cream | Round | raised | Entire | + rod | + | - | + | - | - | - | - | - | *Lysinbacillus sphaericus* |
| BLS 10-3a2 | Pink | Round | raised | Undulate | - cocci | + | - | + | - | - | - | + | - | *Bacillus coagulans* |
| MLS 1 | Cream | Irregular | raised | Undulate | + rod | + | - | + | - | - | - | + | - | *Paunibacillus thailandensis* |
| DTL 1 | Cream | Round | Flat | Entire | + cocci | + | - | + | - | - | - | - | - | *Bacillus coagulans* |
| DTL 3 | Pink | Round | raised | Entire | + cocci | + | - | + | - | - | - | - | - | *Staphylococcus equorum subsp.linens* |
| CCL 2 | Cream | Round | Flat | Entire | + rod | + | - | + | - | - | - | - | + | *Lysinbacillus sphaericus* |
| BLS 10-3c | PINK | Round | Flat | Undulate | + rod | + | - | - | - | - | - | - | - | *Proteus mirabilis* |
| BLS 10-3a | Cream | Round | Flat | Entire | + rod | + | - | + | - | - | - | - | - | *Lysinbacillus sphaericus* |
| BLS 10-3b | Brown | Irregular | raised | Undulate | + rod | + | - | + | - | - | - | - | - | *Lysinbacillus sphaericus* |
| BLS 10-3 | Cream | Round | Flat | Entire | + rod | + | - | + | - | - | - | - | - | *Lysinbacillus sphaericus* |

Key: ‘+’ = positive, ‘-’ = negative

**TABLE 2c: Morphology, Microscopic and Biochemical characterisation of bacteria obtained from Hotels’ washing machines**

| Isolates Code | Colour | Shape | Elevation | Margin | Gram Reaction | Catalase | Coagulase | Citrate | Urease | Indole | Casein hydrolysis | Starch hydrolysis | Maltose fermentation | Probable identification |
| --- | --- | --- | --- | --- | --- | --- | --- | --- | --- | --- | --- | --- | --- | --- |
| RCH 10-3 | Cream | Round | Flat | Entire | + rod | + | - | + | - | - | - | - | - | *Lysinbacillus sphaericus* |
| RCH 10-3a | Cream | Irregular | raised | Entire | + cocci | + | - | + | - | + | - | - | + | *Micrococcus flavus* |
| IHH10-3b | Cream | Round | raised | Undulate | + cocci | + | - | - | + | - | - | - | + | *Jeotgalicoccus halophilus* |
| HGH 10-3ai | Cream | Round | Flat | Entire | + cocci | + | + | + | - | - | - | - | - | *Jeotgalicoccus halophilus* |
| RES 10-3 | Cream | Round | Flat | Entire | + cocci | + | + | + | - | + | - | - | - | *Aliicoccus persicus* |
| AAL 2 | Pink | Round | Flat | Entire | + cocci | + | + | - | - | - | - | - | + | *Jeotgalicoccus marinus* |
| AAL 4 | Pink | Irregular | raised | Undulate | + rod | + | + | + | - | - | - | + | _ | *Lysinbacillus sphaericus* |
| DPH 2 | Cream | Irregular | Flat | Entire | + cocci | + | + | + | - | - | - | + | + | *Salinicoccus luteus* |
| HGH 3 | Pink | Irregular | Flat | Entire | - cocci | - | - | - | - | - | + | - | + | *Jeotgalicoccus pinnipedialis* |
| RES 10-3a | Pink | Round | Flat | Entire | + cocci | + | - | + | - | - | + | - | - | *Jeotgalicoccus pinnipedialis* |
| IHH 10-4 | Cream | Round | Flat | Entire | - rod | + | - | + | - | - | - | - | - | *Myroides odoratus* |
| AAL 10-4 | Cream | Round | Flat | Entire | - rod | + | + | + | - | - | - | - | - | *Aneurinibacillus aneurinilyticus* |
| DPH 10-3c | Pink | Irregular | Flat | Entire | - rod | + | + | + | - | - | - | - | - | *Psedomonas tremae* |
| RCH 10-3 | Pink | Round | raised | Undulate | + cocci | + | + | + | - | - | - | - | + | *Paunibacillus residui* |
| AAL 2 | Cream | Round | raised | Undulate | + cocci | + | - | + | - | - | - | - | - | *Staphylococcus equorun* |
| AAL 10-3 | Pink | Round | raised | Entire | + cocci | - | + | + | - | - | - | - | - | *Aneurinbacillus aneurinuyticus* |
| DPH 2 | Pink | Round | raised | Entire | + rod | + | - | + | - | - | - | - | - | *Brevibacillus centrosporus* |
| IHH 10-5 | Cream | Round | Flat | Entire | + cocci | - | - | + | - | - | - | - | + | *Micrococcus flavus* |
| RCH 10-4 | Cream | Round | Flat | Entire | - cocci | + | - | + | - | - | - | + | - | *Chromobacterium violaceum* |
| RCH 10-5 | Cream | Fillamentous | Flat | Entire | + cocci | + | - | - | - | - | + | - | - | *Nosocomiicoccus ampullae* |
| RES 10-3a2 | Pink | Fillamentous | Flat | Entire | + cocci | + | + | + | - | - | - | - | - | *Aliicoccus persicus* |
| HGH 10-5 | Cream | Fillamentous | Flat | Fillamentous | + rod | + | - | + | - | - | - | - | - | *Lysinbacillus sphaericus* |
| RES 1 | Cream | Round | Flat | Entire | + cocci | - | - | - | - | - | - | - | - | *Salinicoccus iranensis* |
| RCH 3 | Pink | Round | raised | Entire | + cocci | + | - | + | - | - | + | - | - | *Jeotgalicoccus pinnipedialis* |
| IHH 10-4 | Pink | Fillamentous | Flat | Entire | + rod | + | - | + | - | - | - | + | - | *Lysinbacillus sphaericus* |
| DPH 2 | Pink | Fillamentous | Flat | Entire | - cocci | + | - | - | - | - | - | + | - | *Staphylococcus equorun* |
| AAL 10-3b | Pink | Round | Flat | Undulate | + rod | + | - | + | - | - | - | - | - | *Clostridium sporosphaeroides* |

Key: ‘+’ = positive, ‘-’ = negative

**TABLE 2d: Morphology, Microscopic and Biochemical characterisation of bacteria obtained from washing machines from different Homes**

| Isolates Code | Colour | Shape | Elevation | Margin | Gram Reaction | Catalase | Coagulase | Citrate | Urease | Indole | Casein hydrolysis | Starch hydrolysis | Maltose fermentation | Probable identification |
| --- | --- | --- | --- | --- | --- | --- | --- | --- | --- | --- | --- | --- | --- | --- |
| SUN 10-5 | Cream | Round | Flat | Entire | + cocci | + | - | + | + | - | - | - | - | *Micrococcus luteus* |
| SUN 1b | Cream | Round | raised | Entire | + rod | + | - | + | + | - | - | - | - | *Lysinbacillus sphaericus* |
| KHW 3c | Pink | Round | raised | Entire | + cocci | + | - | + | + | - | - | - | - | *Jeotgalicoccus halophilus* |
| KHW 10-3c | Cream | irregular | Flat | Entire | + rod | + | - | + | + | - | - | - | - | *Aneurinbacillus aneurinuyticus* |
| VHH 10-3a | Pink | irregular | raised | Undulate | + rod | + | - | + | + | - | - | - | - | *Lysinbacillus sphaericus* |
| TWM 10-3a | Pink | irregular | raised | Filamentous | + rod | + | - | + | + | - | - | - | - | *Lysinbacillus sphaericus* |
| SUN 3 | Cream | Round | Flat | Entire | + rod | + | - | + | + | - | - | - | - | *Lysinbacillus sphaericus* |
| HWL 10-3a | Cream | Round | Flat | Entire | - cocci | + | - | + | + | - | - | - | - | *Burkholderia glodioii* |
| VHH | Cream | Round | raised | Entire | + rod | + | - | + | + | - | + | - | - | *Lysinbacillus sphaericus* |
| KHW 10-5a | Cream | Round | Flat | Entire | - cocci | + | - | + | + | - | - | + | - | *Pseudomonas delhiensis* |
| VHH 10-3 | Cream | Round | Flat | Entire | + cocci | + | - | + | + | - | - | + | - | *Jeotgalicoccus halophilus* |
| TWM 10-5 | Pink | Irregular | raised | Undulate | + rod | + | - | + | + | - | - | - | - | *Jeotgalicoccus halophilus* |
| HWL 10-5a | Cream | Round | raised | Entire | + rod | + | - | + | + | - | - | + | - | *Paenibacillus septentrionalis* |
| KHW 10-4 | Cream | Round | Flat | Entire | + cocci | + | - | + | + | - | - | + | - | *Staphylococcus equorum* |
| SUN 2 | Cream | Round | Flat | Entire | + cocci | + | - | + | + | - | - | - | - | *Staphylococcus equorum* |
| HWL 10-3b | Pink | Irregular | Flat | Undulate | + rod | + | - | + | + | - | + | + | - | *Lysinbacillus fusiformis* |
| KHW 10-3b | Cream | Round | Flat | Fillamentous | + rod | + | - | + | + | - | - | - | - | *Lysinbacillus sphaericus* |
| HWL 10 | Pink | Irregular | Flat | Fillamentous | + cocci | + | - | + | + | - | - | + | - | *Jeotgalicoccus halophilus* |
| HWL 1b | Cream | Round | raised | Entire | - rod | + | - | + | + | - | - | + | - | *Proteus mirabilis* |
| HWL 1 | Cream | Round | Flat | Entire | - rod | + | - | - | + | - | - | - | - | *Alcaligenes* sp. |

Key: ‘+’ = positive, ‘-’ = negative

**TABLE 2e: Morphology, Microscopic and Biochemical characterisation of bacteria obtained from washing machines from different Hostels**

| Isolates Code | Colour | Shape | Elevation | Margin | Gram Reaction | Catalase | Coagulase | Citrate | Urease | Indole | Casein hydrolysis | Starch hydrolysis | Maltose fermentation | Probable identification |
| --- | --- | --- | --- | --- | --- | --- | --- | --- | --- | --- | --- | --- | --- | --- |
| NHL10-3ai | Cream | Round | Flat | Entire | + cocci | - | - | + | - | - | - | - | + | *Micrococcus flavus* |
| AGV 4 | Cream | Fillamentous | F lat | Entire | + cocci | + | - | + | - | - | - | - | - | *Oligella ureolytica* |
| AAU 3a | Cream | Round | raised | Entire | + cocci | + | - | + | - | - | + | - | - | *Nosocomiicoccus ampullae* |
| AGV 1 | Cream | Round | Flat | Entire | + cocci | + | + | + | - | - | - | - | - | *Aliicoccus persicus* |
| BCH 1 | Cream | Round | Flat | Fillamentous | + cocci | - | - | + | + | - | - | - | - | *Staphylococcus* spp |
| AAA | Cream | Round | raised | Entire | - rod | + | - | + | - | - | + | - | - | *Achromobacter* spp*.* |
| JPH 10-3c | Cream | Round | Flat | Entire | - rod | + | - | + | + | - | - | - | - | *Oligella ureolytica* |
| JPH10-3b* | Cream | Fillamentous | raised | Entire | + rod | + | - | + | + | - | - | - | - | *Lysinbacillus sphaericus* |
| JHL 2a | Cream | Round | Flat | Undulate | - rod | - | - | + | + | - | - | - | - | *Oligella ureolytica* |
| AAU 2b | Pink | irregular | raised | Undulate | + rod | + | + | + | + | + | - | - | + | *Salinicoccus iranensis* |
| JHL | Pink | Round | Flat | Entire | + rod | + | - | + | + | - | - | - | + | *Paunibacillus cellulositrophicus* |
| BCH 10-3ai | Cream | irregular | Flat | Entire | + rod | - | - | + | + | - | - | - | - | *Lysinbacillus sphaericus* |
| BCH 10-3 | Pink | irregular | Flat | Undulate | + rod | + | - | + | + | - | - | - | - | *Lysinbacillus sphaericus* |
| NHL 10-3a | Cream | Round | Flat | Entire | + rod | + | - | + | + | - | - | - | - | *Lysinbacillus sphaericus* |
| AGV 1 | Cream | Round | Flat | Entire | - rod | + | - | + | + | - | - | - | - | *Pseudomonas putida* |
| AAU 3b | Cream | Round | Flat | Entire | - rod | + | - | + | + | - | - | + | - | *Bacillus lentus* |
| AAA 10-5 | Cream | Round | Flat | Entire | - rod | + | - | + | + | - | - | + | - | *Bacillus lentus* |
| JPH 2 | Cream | Round | raised | Entire | - cocci | + | - | + | + | - | - | - | + | *Oligella ureolytica* |
| NHL 10-3a | Cream | irregular | raised | Undulate | + rod | + | - | + | + | - | - | - | - | *Lysinbacillus sphaericus* |
| JPH 1 | Cream | irregular | Flat | Fillamentous | + cocci | + | - | + | + | - | - | - | - | *Lysinbacillus sphaericus* |
| JHL 10-5 | Pink | Round | Flat | Entire | + rod | + | - | + | + | - | - | - | - | *Aliicoccus persicus* |
| BCH 1 | Cream | Round | Flat | Entire | - rod | + | - | + | + | - | - | - | - | *Oligella ureolytica* |
| AAU 1 | Cream | Round | Flat | Entire | + rod | + | - | + | + | + | - | - | - | *Lysinbacillus sphaericus* |
| AAA 10-4 | Pink | Round | Flat | Entire | - cocci | + | - | - | + | - | - | - | - | *Seratia plymuthica* |

Key: ‘+’ = positive, ‘-’ = negative

Table 3a: Susceptibility of Gram Positive Bacteria Isolates to Antibiotics

| Isolate | CRX | GEN | CTR | ERY | CXC | OFL | AUG | CAZ | % Resistance |
| --- | --- | --- | --- | --- | --- | --- | --- | --- | --- |
| *Lysinibacillus sphaericus* | R | S | S | R | R | S | R | S | 50 |
| *Staphylococcus equorum* | R | S | R | R | R | S | R | R | 75 |
| *Staphylococcus hominis* | R | S | S | R | R | S | R | R | 62.55 |
| *Paenibacillus cellulositrophicus* | R | S | I | R | R | S | R | R | 62.55 |
| *Lysinibacillus sphaericus* | R | S | I | I | R | S | R | R | 50 |
| *Lysinibacillus sphaericus* | R | R | I | R | R | S | R | R | 75 |
| *Salinicoccus luteus* | R | S | I | R | R | S | R | R | 62.50 |
| *Staphylococcus equorum* | R | S | I | R | R | S | R | R | 62.50 |
| *Jeotgalicoccus halophilus* | R | S | I | S | R | S | R | R | 50 |
| *Jeotgalicoccus halophilus* | R | S | I | R | R | S | R | R | 62.50 |
| *Nosocomiicoccus ampullae* | R | S | R | R | R | S | R | R | 75 |
| *Alkalicoccus persitus* | R | R | I | R | R | S | R | R | 75 |
| *Staphylococcus equorum* | R | S | R | S | R | S | R | R | 62.50 |
| *Jeotgalicoccus halophilus* | R | S | R | R | R | S | R | R | 75 |
| *Lysinibacillus fusiformis* | R | S | I | R | R | S | R | R | 62.50 |
| *Staphylococcus epidermis* | R | S | I | R | R | R | S | R | 50 |
| *Vorticella sediminum* | R | I | I | R | R | S | R | R | 62.50 |
| *Solinicocccs spp* | R | S | R | I | R | S | R | S | 50 |
| *Lysinibacillus fusiformis* | R | I | I | R | R | S | R | R | 62.50 |
| *Staphylococcus equorum* | R | S | I | I | R | R | S | R | 50 |
| *Vorticella sediminum* | R | I | I | R | R | S | R | R | 62.50 |
| *Staphylococcus equorum* | R | I | R | R | R | S | R | R | 75 |
| *Lysinibacillus sphaericus* | S | S | I | R | R | S | R | R | 50 |
| *Jeotgalicoccus halophilus* | R | I | I | R | R | S | R | S | 50 |
| *Micrococcus flavus* | R | R | I | R | R | S | R | R | 75 |
| *Lysinibacillus sphaericus* | R | S | I | R | R | S | R | R | 62.50 |
| *Micrococcus luteus* | S | S | I | R | R | S | R | R | 50 |
| *Lysinibacillus sphaericus* | R | R | R | I | R | I | R | R | 75 |
| *Solinicoccus alkaliphilus* | R | S | R | R | R | S | R | R | 75 |
| *Lysinibacillus sphaericus* | R | S | R | I | R | I | R | R | 62.50 |
| *Staphylococcus equorum* | R | S | R | R | R | S | R | R | 75 |
| *Bacillus lentus* | R | S | R | R | R | R | R | R | 87.50 |
| *Lysinibacillus sphaericus* | R | S | I | R | R | I | R | R | 62.50 |
| *Lysinibacillus sphaericus* | R | R | R | R | R | I | R | R | 87.50 |
| *Staphylococcus equorum* | R | S | I | R | R | I | R | R | 62.50 |
| *Aneurimibacillus aneurinilytitus* | S | S | S | S | R | S | S | R | 25 |
| *Solibacillus silvestris* | R | R | I | R | R | S | R | R | 75 |
| *Jeotgalicoccus pinnipedialis* | R | R | I | R | R | S | R | R | 75 |
| *Lysinibacillus sphaericus* | R | S | I | I | R | S | R | R | 50 |
| *Lysinibacillus sphaericus* | R | S | R | R | R | S | R | R | 75 |
| *Solibacillus silvestris* | S | S | I | I | R | S | R | S | 25 |
| *Staphylococcus equorum* | R | S | I | R | R | S | R | R | 62.50 |
| *Paenibacillus thailandensis* | R | I | I | I | R | S | S | S | 25 |
| *Bacillus coagulans* | R | S | R | R | R | S | R | R | 75 |
| *Lysinibacillus sphaericus* | S | S | R | R | R | S | R | R | 62.50 |
| *Lysinibacillus sphaericus* | S | S | I | I | R | S | R | R | 37.50 |
| *Lysinibacillus sphaericus* | R | S | I | R | R | S | R | I | 50 |
| *Bacillus lentus* | R | S | I | R | R | S | R | R | 6.50 |
| *Aneurimibacillus aneurinilytitus* | R | R | R | R | R | S | R | R | 87.50 |
| *Paenibacillus cepteltrionalis* | R | S | S | I | R | S | R | R | 50 |
| *Jeotgalicoccus halophilus* | R | S | R | R | R | S | R | R | 75 |
| *Jeotgalicoccus halophilus* | R | S | R | R | R | S | R | R | 75 |
| *Salinicoccus hispenicus* | R | S | I | R | R | S | R | R | 62.50 |
| *Jeotgalicoccus halophilus* | R | S | R | R | R | S | R | R | 75 |
| *Lysinibacillus sphaericus* | R | S | R | R | R | S | R | R | 75 |
| *Bacillus vietnamensis* | R | S | R | R | R | S | R | R | 75 |
| *Clostridium sartagoforne* | R | S | R | R | R | S | R | R | 75 |
| *Staphylococcus equorum* | R | S | R | R | R | S | R | R | 75 |
| *Lysinibacillus sphaericus* | R | S | S | R | R | S | R | R | 62.50 |
| *Jeotgalicoccus pinnipedialis* | R | R | I | R | R | S | R | R | 75 |
| *Lysinibacillus sphaericus* | S | R | R | S | R | S | R | R | 62.50 |
| *Vorticella sediminum* | R | S | S | R | R | S | R | R | 62.50 |
| *Jeotgalicoccus marinus* | R | S | R | R | R | S | R | R | 75 |
| *Alkalicoccus persitus* | S | S | I | R | R | S | R | R | 50 |
| *Salinicoccus luteus* | R | S | R | R | R | S | R | R | 70 |
| *Clostridium sporosphaeroides* | I | S | S | R | R | R | R | I | 50 |
| *Staphylococcus captis* | R | S | S | R | R | S | R | R | 62.50 |
| *Jeotgalicoccus pinnipedialis* | R | S | S | R | R | S | R | R | 62.50 |
| *Staphylococcus schleiferi* | R | S | S | I | R | S | R | I | 25 |
| *Jeotgalicoccus halophilus* | R | S | S | R | R | S | R | R | 62.50 |
| *Clostridium tertium* | R | S | S | R | R | S | R | R | 62.50 |
| *Lysinibacillus sphaericus* | R | S | I | I | R | S | R | R | 50 |
| *Lysinibacillus fusiformis* | R | S | I | R | R | S | R | R | 62.50 |
| *Lysinibacillus sphaericus* | R | S | R | R | R | S | R | R | 75 |
| *Salinicoccus luteus* | R | S | R | R | R | S | R | R | 75 |
| *Lysinibacillus sphaericus* | R | S | I | R | R | S | R | R | 62.50 |
| *Lysinibacillus sphaericus* | R | S | I | R | R | S | R | R | 62.50 |
| *Kocuria marina* | R | R | R | R | R | S | R | R | 87.50 |
| *Lysinibacillus sphaericus* | R | S | I | R | R | S | R | R | 62.50 |
| *Jeotgalicoccus halophilus* | S | S | S | R | R | S | R | R | 50 |
| *Lysinibacillus fusiformis* | R | S | S | R | R | S | R | R | 62.50 |
| *Micrococcus flavus* | R | S | R | I | R | S | R | R | 62.50 |
| *Alkaliicoccus persitus* | R | S | I | R | R | S | R | S | 50 |
| *Lysinibacillus sphaericus* | R | S | I | R | R | S | R | S | 50 |
| *Vorticella sediminum* | R | S | R | R | R | S | R | R | 75 |
| *Tersicoccus solisilvae* | R | I | I | I | R | S | R | S | 37.50 |
| *Mycobacterium chelonae* | R | R | R | R | R | I | R | R | 87.50 |
| *Lysinibacillus sphaericus* | R | S | S | I | R | S | R | R | 50 |
| *Staphylococcus equorum* | R | S | I | I | R | R | R | R | 62.50 |
| *Salinicoccus iranensis* | S | S | S | I | R | S | R | S | 25 |
| *Clostridium botulinum* | R | R | R | I | R | S | R | R | 75 |
| *Paenibacillus thailandensis* | R | R | S | R | R | S | R | R | 75 |
| *Clostridium inocuum* | R | S | I | R | R | S | R | R | 62.50 |
| *Lysinibacillus sphaericus* | R | S | I | R | R | S | R | R | 62.50 |
| *Jeotgalicoccus pinnipedialis* | R | R | I | R | R | S | R | R | 70 |
| *Lysinibacillus sphaericus* | R | S | I | R | R | I | R | R | 62.50 |
| *Lysinibacillus sphaericus* | R | S | I | R | R | S | R | R | 62.50 |
| *Nosocomiicoccus ampullae* | R | S | I | I | R | S | R | R | 50 |
| *Lysinibacillus fusiformis* | R | S | S | R | R | S | R | R | 62.50 |
| *Aneurinbacillus aneurinilyticus* | R | S | R | S | R | S | R | R | 62.50 |
| *Alkalicoccus persitus* | R | S | S | R | R | S | R | R | 62.50 |
| *Lysinibacillus sphaericus* | R | S | S | S | R | S | S | R | 37.50 |
| *Lysinibacillus sphaericus* | R | S | R | R | R | S | R | R | 75 |
| *Jeotgalicoccus pinnipedialis* | R | S | R | R | R | S | R | R | 75 |
| *Micrococcus flavus* | R | S | I | R | R | S | R | R | 62.50 |
| *Lysinibacillus sphaericus* | R | S | I | R | R | S | R | R | 62.50 |
| *Lysinibacillus sphaericus* | R | S | I | I | R | S | R | R | 50 |
| *Bacillus lentus* | R | S | I | R | R | S | S | R | 50 |
| Number of resistance | 98 | 15 | 35 | 81 | 108 | 6 | 102 | 98 |  |
| Resistance for each antibiotic (%) | 90.74% | 13.76% | 32.11% | 74.31% | 99.08% | 5.50% | 93.58% | 89.91% |  |

Key: CAZ: Ceftazidime (30 µg); CRX: Cefuroxime (30µg); GEN: Gentamicin (10µg); CTR: Ceftriaxone (30µg); ERY: Erythromycin (5 µg); CXC: Cloxacillin (5µg); OFL: Ofloxacin (5 µg); AUG: Amoxycillin/Clavulanate (30 µg)

R: Resistant; S: Sensitive; I: Intermediate

Table 3b: Susceptibility of Gram Negative Bacteria Isolates to Antibiotics

| ISOLATES | CRX | GEN | OFL | AUG | CAZ | CPR | NIT | AMP | % of Resistance |
| --- | --- | --- | --- | --- | --- | --- | --- | --- | --- |
| *Oligella ureolytica* | S | S | S | S | S | S | S | R | 12.50 |
| *Alcaligenes sp.* | R | S | S | R | R | S | R | R | 62.50 |
| *Burkholderia pseudomallei* | R | R | R | S | S | R | S | R | 62.50 |
| *Proteus mirabilis* | R | R | S | R | R | S | R | R | 75.00 |
| *Pseudomonas grammis* | R | R | R | R | R | R | S | R | 87.50 |
| *Oligella ureolytica* | R | S | S | S | R | S | S | R | 37.50 |
| *Oligella ureolytica* | R | S | S | R | R | S | R | R | 62.50 |
| *Oligella ureolytica* | I | S | S | R | R | S | R | R | 50.00 |
| *Proteus mirabilis* | R | S | S | R | R | I | S | R | 50.00 |
| *Oligella ureolytica* | S | S | S | R | R | S | I | R | 37.50 |
| *Pseudomonas grammis* | R | R | I | R | R | R | R | R | 87.50 |
| *Pseudomonas grammis* | R | S | S | R | R | I | S | R | 50.00 |
| *Chromobacterium violaceun* | R | S | R | R | S | I | R | R | 62.50 |
| *Burkholderia pseudomallei* | R | R | S | R | R | I | R | R | 75.00 |
| *Chromobacterium violaceun* | I | R | S | R | R | S | S | R | 50.00 |
| *Oligella ureolytica* | R | S | I | R | R | I | S | R | 50.00 |
| *Burkholderia alodioii* | R | S | S | R | R | S | R | R | 62.50 |
| *Burkholderia pseudomallei* | R | S | S | R | R | I | R | R | 62.50 |
| *Oligella ureolytica* | S | S | S | R | R | R | S | R | 50.00 |
| *Chromobacterium violaceun* | S | S | S | R | R | S | S | R | 37.50 |
| *Oligella ureolitica* | S | S | S | R | R | S | S | R | 37.50 |
| *Chromobacterium rhizoryzae* | S | S | S | R | R | S | R | R | 50.00 |
| *Acidovorax facillis* | R | R | S | R | R | I | R | R | 75.00 |
| *Pseudomonas grammis* | R | R | S | R | R | I | S | R | 62.50 |
| Number of resistance | 16 | 7 | 1 | 22 | 23 | 3 | 12 | 24 |  |
| Percentage resistance for each antibiotics | 66.0% | 29.0% | 4.35% | 91.0% | 95.0% | 13.04% | 50.0% | 100% |  |

KEYS**:** CAZ: Ceftazidime (30 µg); CRX: Cefuroxime (30 µg); GEN: Gentamicin (10 µg);

CPR: Ciprofloxacin (5 µg); OFL: Ofloxacin (5 µg); AUG: Amoxycillin/Clavulanata (30 µg); NIT: Nitrofurantoin (300 µg); AMP: Ampicillin (10 µg)

R: Resistant; S: Sensitive; I: Intermediate

Table 4: Antibiotic Susceptibility Test for Bacteria Isolates with Resistant > 75%

| ISOLATES | ATH(15µg) | CD (2 µg) | SMX (100 µg) | | Resistance (%) |
| --- | --- | --- | --- | --- | --- |
| *Kocuria marina* | S | S | R | 33.33 | |
| *Nosocomiicoccus ampullae* | S | S | R | 33.33 | |
| *Paenibacillus thailandensis* | S | I | R | 33.33 | |
| *Jeotgalicoccus halophilus* | S | S | R | 33.33 | |
| *Staphylococcus epidermis* | S | R | R | 66.67 | |
| *Clostridium sartagoforme* | S | S | R | 33.33 | |
| *Lysinbacillus sphaericus* | S | S | R | 33.33 | |
| *Achromobacter spp* | R | R | R | 100 | |
| *Salinococcus luteus* | S | S | R | 33.33 | |
| *Burkholderia gladioli* | S | S | R | 33.33 | |
| *Jeotgalicoccus halophilus* | S | R | R | 66.67 | |
| *Acidovorax facillis* | S | S | R | 33.3 | |
| *Vorticella sedi* | S | R | R | 66.67 | |
| *Burkholderia gladioli* | S | S | R | 33.33 | |
| *Proteus mirabilis* | R | R | R | 100 | |
| *Burkholderia pseudomallei* | S | R | R | 66.67 | |
| *Staphylococcus hominis* | S | S | R | 33.33 | |
| *Lysinbacillus sphaericus* | S | S | R | 33.33 | |
| *Jeotgalicoccus halophilus* | S | S | R | 33.33 | |
| *Tersicoccus solisitvae* | R | S | R | 66.67 | |
| *Lysinbacillus sphaericus* | S | S | R | 33.33 | |
| *Lysinbacillus sphaericus* | S | S | R | 33.33 | |
| *Salibacillus silvestris* | R | R | R | 100 | |
| *Staphylococcus equorum* | R | R | R | 100 | |
| *Bacillus lentus* | R | R | R | 100 | |
| *Jeotgalicoccus halophilus* | R | R | R | 100 | |
| *Jeotgalicoccus pinnipedialis* | S | S | R | 33.33 | |
| *Salinicoccus luteus* | S | R | R | 66.67 | |
| *Bacillus lentus* | R | R | R | 100 | |
| *Paenibacillus cellulositrophicus* | S | S | R | 33.33 | |
| *Jeotgalicoccus halophilus* | S | S | R | 33.33 | |
| *Lysinbacillus sphaericus* | S | R | R | 66.67 | |
| *Lysinbacillus sphaericus* | S | R | R | 66.67 | |
| *Jeotgalicoccus halophilus* | S | S | R | 33.33 | |
| *Alkalicoccus persitus* | R | R | R | 100 | |
| *Lysinbacillus sphaericus* | S | S | R | 33.33 | |
| *Lysinbacillus sphaericus* | R | R | R | 100 | |
| Number of resistance | 10 | 16 | 37 |  | |
| Percentage resistance for each antibiotics | 27.0% | 43.0% | 100% |  | |

KEYS**:** ATH: Azithromycin; CD: Clindamycin; SMX: Sulphamethoxazole;

R: Resistant; S: Sensitive; I: Intermediate.

Table 5a: Biofilm production potentials of isolated bacteria in Hospital Washing Machines

| Isolate code | Probable microorganism | Mean (CFU) ± STD | Biofilm Former Group |
| --- | --- | --- | --- |
| BTH10-5 | *Myroides odoratus* | 0.177±0.025 | Moderate |
| LTH10-3 | *Aneurinibacillus aneurinilyticus* | 0.239±0.013 | Moderate |
| LHC1 | *Psedomonas tremae* | 0.184±0.026 | Moderate |
| BTH10-4 | *Paenibacillus residui* | 0.194±0.038 | Moderate |
| MHS10-3a | *Staphylococcus equorum* | 0.159±0.028 | moderate |
| LTH2 | *Aneurinbacillus aneurinuyticus* | 0.239±0.127 | moderate |
| BTH10-3c | *Brevibacillus centrosporus* | 0.156±0.029 | moderate |
| MHS3 | *Micrococcus flavus* | 0.213±0.059 | Moderate |
| GHS10-3b | *Chromobacterium violaceum* | 0.170±0.016 | moderate |
| GHS10-3 | *Nosocomiicoccus ampullae* | 0.181±0.021 | Moderate |
| LHC1 | *Alkalicoccus persicus* | 0.163±0.050 | Moderate |
| LHC1b | *Lysinibacillus sphaericus* | 0.260±0.023 | moderate |
| MHS2 | *Salinicoccus iranensis* | 0.201±0.053 | moderate |
| BTH10-3b | *Jeotgalicoccus pinnipedialis* | 0.224±0.063 | Moderate |
| GHS 2a | *Lysinibacillus sphaericus* | 0.148±0.012 | Moderate |
| LHC10-3c | *Staphylococcus equorun* | 0.194±0.035 | Moderate |
| LHC-3a | *Clostridium sporosphaeroides* | 0.132±0.009 | Weak |
| LTH 3b | *Micrococcus flavus* | 0.166±0.063 | moderate |
| LTH 2b | *Oligella ureolytica* | 0.175±0.010 | Moderate |
| MHS 2 | *Nosocomiicoccus ampullae* | 0.147±0.006 | Weak |
| LHC 10-3b | *Alkalicoccus persicus* | 0.159±0.022 | Moderate |
| LTH 3 | *Achromobacter* sp | 0.166±0.012 | Moderate |
| LTH 10-3b | *Oligella ureolytica* | 0.184±0.045 | moderate |
| BTH 3 | *Lysinibacillus sphaericus* | 0.215±0.053 | Moderate |
| GHS 10-3c | *Oligella ureolytica* | 0.250±0.087 | moderate |
| GHS 10-3 | *Salinicoccus iranensis* | 0.154±0.039 | moderate |

Table 5b: Biofilm production potentials of isolated bacteria from Dry Cleaning Shops Washing Machines

| Isolate Code | Probable microrganism | | Mean (CFU) ± STD | | | Biofilm Former Group |
| --- | --- | --- | --- | --- | --- | --- |
| KLS 10-3a | | *Jeotgalicoccus pimipedialis* | | 0.135±0.008 | weak | |
| LAA 2 | | *Mycobacterium cheloriae* | | 0.146±0.013 | weak | |
| CCL 10-3a | | *Vorticella sediminum* | | 0.164±0.026 | moderate | |
| HCR 1b | | *Clostridium sartagoforme* | | 0.107±0.013 | weak | |
| HCR 10-3c | | *Acidovoieix facillis* | | 0.161±0.032 | moderate | |
| WLS 10-3b | | *Brevundinoas dininuta* | | 0.147±0.026 | weak | |
| WLS 10-3b | | *Oligella ureolytica* | | 0.162±0.021 | Moderate | |
| DTL-3a | | *Kocuna marina* | | 0.279±0.115 | moderate | |
| GDC 1 | | *Salinieoccus alikaliphilus* | | 0.161±0.016 | moderate | |
| JFH 10-3b | | *Lysinibacillus sphaericus* | | 0.189±0.021 | moderate | |
| JFH 3 | | *Staphylococcus schleiferi* | | 0.174±0.023 | moderate | |
| LAA 10-3 | | *Jeotgalicocccus halophilus* | | 0.215±0.021 | moderate | |
| JAL 10-3b | | *Staphylococcus equorum* | | 0.166±0.028 | moderate | |
| JAL 1b | | *Paenibacillus septentrionalis* | | 0.159±0.007 | moderate | |
| KLS 10-3b | | *Staphylococcus* sp | | 0.360±0.080 | Strong | |
| KLS 3 | | *Jeotgalicoccus halophilus* | | 0.155±0.009 | moderate | |
| DTL 10-3a | | *Abyssicoccus albus* | | 0.216±0.065 | moderate | |
| JAL 10-4 | | *Salinicoccus luteus* | | 0.167±0.027 | moderate | |
| HCR 10-3b | | *Staphylococcus equorum* | | 0.141±0.008 | weak | |
| BLS 10-3a2 | | *Staphylococcus equorum* | | 0.191±0.029 | moderate | |
| MLS 1 | | *Vorticella sediminum* | | 0.121±0.014 | weak | |
| DTL 1 | | *Lysinibacillus sphaericus* | | 0.160±0.023 | moderate | |
| DTL 3 | | *Vorticella sediminum* | | 0.157±0.015 | moderate | |
| CCL 2 | | *Lysinibacillus sphaericus* | | 0.191±0.052 | moderate | |
| BLS 10-3c | | *Jeotgalicoccus halophilus* | | 0.148±0.028 | moderate | |
| BLS 10-3a | | *Lysinibacillus fusiformis* | | 0.168±0.007 | moderate | |
| BLS 10-3b | | *Alcaligens* spp | | 0.161±0.017 | moderate | |
| BLS 10-3 | | *Salinicoccus alkaliphilus* | | 0.204±0.039 | moderate | |

Table 5c: Biofilm production potentials of isolated bacteria in Hotels and Suites Washing Machines

| Isolate Code | Probable microrganism | Mean (CFU) ± STD | Biofilm Former Group |
| --- | --- | --- | --- |
| RCH 10-3 | *Lysinibacillus sphaericus* | 0.169±0.005 | Moderate |
| RCH 10-3a | *Nosocomiicoccus ampullae* | 0.147±0.037 | weak |
| IHH10-3b | *Staphylococcus capitis* | 0.182±0.009 | Moderate |
| HGH 10-3ai | *Bacillus vietnamensis* | 0.142±0.006 | weak |
| RES 10-3 | *Clostridium tertian* | 0.140±0.012 | Weak |
| AAL 2 | *Paenibacillus macquariensis* | 0.179±0.028 | Moderate |
| AAL 4 | *Paenibacillus thailandensis* | 0.158±0.012 | Moderate |
| DPH 2 | *Salinicoccus luteus* | 0.147±0.022 | Weak |
| HGH 3 | *Jeotgalicoccus pinnipedialis* | 0.146±0.001 | Weak |
| RES 10-3a | *Lysinibacillus sphaericus* | 0.129±0.014 | Weak |
| IHH 10-4 | *Clostridium innocuum* | 0.117±0.009 | Weak |
| AAL 10-4 | *Lysinibacillus sphaericus* | 0.146±0.030 | Weak |
| DPH 10-3c | *Bacillus coagulans* | 0.170±0.018 | Moderate |
| RCH 10-3 | *Paenibacillus thailandensis* | 0.118±0.005 | Weak |
| AAL 2 | *Bacillus coagulans* | 0.137±0.012 | weak |
| AAL 10-3 | *Staphylococcus equorum* | 0.092±0.020 | weak |
| DPH 2 | *Lysinibacillus sphaericus* | 0.126±0.010 | Weak |
| IHH 10-5 | *Proteus mirabilis* | 0.142±0.021 | Weak |
| RCH 10-4 | *Lysiibacillus sphaericus* | 0.169±0.049 | Moderate |
| RCH 10-5 | *Lysinibacillus sphaericus* | 0.119±0.009 | Weak |
| RES 10-3a2 | *Lysinibacillus sphaericus* | 0.122±0.005 | weak |
| HGH 10-5 | *Lysinibacillus sphaericus* | 0.118±0.002 | Weak |
| RES 1 | *Micrococcus flavus* | 0.146±0.035 | Weak |
| RCH 3 | *Jeotgalicoccus halophilus* | 0.126±0.008 | weak |
| IHH 10-4 | *Jeotgalicoccus halophilus* | 0.119±0.005 | Weak |
| DPH 2 | *Alkalicoccus persicus* | 0.218±0.015 | moderate |
| AAL 10-3b | *Jeotgalicoccus marinus* | 0.192±0.041 | Moderate |

Table 5d: Biofilm production potentials of isolated bacteria from Home Washine Machines

| Isolate Code | Probable microrganism | Mean (CFU) ± STD | Biofilm Former Group |
| --- | --- | --- | --- |
| RCH 10-3 | *Salinicoccus iranensis* | 0.154±0.039 | moderate |
| RCH 10-3a | *Paenibacillus cellulositrophicus* | 0.161±0.008 | moderate |
| IHH10-3b | *Lysinibacillus sphaericus* | 0.189±0.009 | moderate |
| HGH 10-3ai | *Lysinibacillus sphaericus* | 0.195±0.005 | moderate |
| RES 10-3 | *Lysinibacillus sphaericus* | 0.183±0.020 | moderate |
| AAL 2 | *Pseudomonas grammis* | 0.132±0.014 | weak |
| AAL 4 | *Bacillus lentus* | 0.179±0.027 | moderate |
| DPH 2 | *Bacillus lentus* | 0.164±0.018 | moderate |
| HGH 3 | *Oligella ureolytica* | 0.178±0.054 | moderate |
| RES 10-3a | *Lysinibacillus sphaericus* | 0.112±0.018 | weak |
| IHH 10-4 | *Lysinibacillus sphaericus* | 0.150±0.013 | moderate |
| AAL 10-4 | *Alkalicoccus persicus* | 0.147±0.012 | weak |
| DPH 10-3c | *Oligella ureolytica* | 0.173±0.044 | moderate |
| RCH 10-3 | *Lysinibacillus sphaericus* | 0.125±0.008 | weak |
| AAL 2 | *Seratia plymuthica* | 0.139±0.007 | weak |
| AAL 10-3 | *Micococcus luteus* | 0.174±0.037 | moderate |
| DPH 2 | *Lysinibacillus sphaericus* | 0.152±0.034 | moderate |
| IHH 10-5 | *Jeotgalicoccus halophilus* | 0.165±0.003 | moderate |
| RCH 10-4 | *Aneurinbacillus aneurinuyticus* | 0.128±0.022 | weak |
| RCH 10-5 | *Lysinibacillus sphaericus* | 0.170±0.019 | moderate |

Table 5e: Biofilm production potentials of isolated bacteria in hospitals in Hostels Washing Machines

| Isolate Code | Probable microorganism | Mean (CFU) ± STD | Biofilm Former Group |
| --- | --- | --- | --- |
| SUN 10-5 | *Lysinibacillus sphaericus* | 0.089±0.017 | weak |
| SUN 1b | *Lysinibacillus sphaericus* | 0.078±0.006 | weak |
| KHW 3c | *Burkholderia glodioii* | 0.110±0.010 | weak |
| KHW 10-3c | *Lysinibacillus sphaericus* | 0.150±0.022 | moderate |
| VHH 10-3a | *Pseudomonas delhiensis* | 0.144±0.051 | weak |
| TWM 10-3a | *Jeotgalicoccus halophilus* | 0.101±0.016 | weak |
| SUN 3 | *Jeotgalicoccus halophilus* | 0.173±0.090 | moderate |
| HWL 10-3a | *Paenibacillus septentrionalis* | 0.204±0.037 | moderate |
| VHH | *Staphylococcus equorum* | 0.182±0.017 | moderate |
| KHW 10-5a | *Staphylococcus equorum* | 0.135±0.014 | weak |
| VHH 10-3 | *Lysinibacillus fusiformis* | 0.185±0.019 | moderate |
| HWL 10-3a | *Burkholderia glodioii* | 0.124±0.035 | weak |
| HWL 10-3b | *Lysinibacillus fusiformis* | 0.114±0.041 | weak |
| TWM 10-5 | *Lysinibacillus sphaericus* | 0.240±0.020 | moderate |
| HWL 10 | *Jeotgalicoccus halophilus* | 0.136±0.005 | weak |
| HWL 1b | *Proteus mirabilis* | 0.142±0.052 | weak |
| HWL 1 | *Alcaligenes* sp. | 0.134±0.062 | weak |
|  | | | |

Interpretation: OD is < 0.37 = non-biofilm former; 0.38 < OD ≤ OD ≤ 0.74 = weak biofilm former; 0.74 < OD ≤ 1.48 = moderate biofilm former; OD > 1.48 = strong biofilm former.

Table 6: Accession Number and Enzyme Activities of selected bacteria isolates

| Isolate Code | Accession number | Isolates | Pectinase | Cellulase | Protease | Lipase | Keratinase | Collagenase |
| --- | --- | --- | --- | --- | --- | --- | --- | --- |
| MLS 104 | OR004707 | *Achromobacter* sp*.* | + | + | - | - | - | + |
| HWL 1b | OR004708 | *Proteus mirabilis* | + | - | - | + | + | - |
| MSH 1 | OR004706 | *Seratia plymuthica* | - | - | - | + | - | - |
| SUN | OR004700 | *Staphylococcus equorum* | + | + | - | - | - | + |
| BTH 1 | OR004704 | *Jeotgalicoccus pinnipedialis* | + | - | - | + | + | - |
| RES 2 | OR004703 | *Oligella ureolytica* | - | + | - | + | - | - |
| HWL 3b | OR004701 | *Staphylococcus* sp*.* | - | - | - | - | - | + |
| AAA 104 | OR004702 | *Myroides odoratus* | - | - | - | - | - | - |
| BLS 103c | OR004705 | *Alcaligenes* sp. | - | + | - | + | + | - |

Keys: + = Positive reaction; - = Negative reaction

Table 7: Connection between biofilm and enzyme production of bacteria from washing machines

|  |  | **Resistance** | **Enzymes Production** | **BS** | **BM** | **BW** |
| --- | --- | --- | --- | --- | --- | --- |
| **Antibiotic Resistance** | Pearson Correlation | 1 |  |  |  |  |
| Sig. (2-tailed) |  |  |  |  |  |
| **Enzymes Production** | Pearson Correlation | 0.399 | 1 |  |  |  |
| Sig. (2-tailed) | 0.505 |  |  |  |  |
| **BS** | Pearson Correlation | 0.703 | 0.375 | 1 |  |  |
| Sig. (2-tailed) | 0.185 | 0.534 |  |  |  |
| **BM** | Pearson Correlation | 0.122 | 0.868 | -0.068 | 1 |  |
| Sig. (2-tailed) | 0.845 | 0.057 | 0.913 |  |  |
| **BW** | Pearson Correlation | 0.365 | 0.357 | 0.612 | -0.111 | 1 |
| Sig. (2-tailed) | 0.545 | 0.555 | 0.272 | 0.859 |  |

Relationship is substantial at 0.01 (2-tailed)

**Keys:** BS: Strong biofilm former; BM: Moderate biofilm former; BW: Weak biofilm former; BN: None biofilm former**; a:** Cannot be computed because at least one of the variables is constant.
